1        **In silico analysis of imprinted gene expression in the mouse skin**

2

3        **Running title:** IGN in mouse skin

4        **Alexandra K. Marr<sup>\*1</sup>, Sabri Boughorbel<sup>1</sup>, Mohammed Toufiq<sup>1</sup>, Mohammed El Anbari<sup>1</sup>,**  
5        **Aouatef I. Chouchane<sup>1</sup>, Tomoshige Kino<sup>1</sup>**

6        <sup>1</sup>Research Department, Sidra Medicine, Doha, Qatar

7

8        **\*Correspondence:**

9        Alexandra K. Marr

10       Phone: +974 30300647

11       amarr@sidra.org

12       **Keywords: imprinted genes, imprinted gene network, hair cycle, cell growth, coordinated**  
13       **expression, telogen, anagen**

## 14 1. Abstract

15 Imprinted genes help mediate embryonic cell proliferation and differentiation, but their roles  
16 after birth are far less well understood. A subset of 16 imprinted gene network (IGN) genes is  
17 expressed at higher levels in stem cell progenitor cells of adult skeletal muscle and epidermis  
18 compared to their differentiated counterparts. While these genes function in muscle regeneration,  
19 their role in the skin is poorly understood. We assessed the expression profiles of these 16 IGN  
20 genes in publicly available datasets and revealed elevated expression of IGN genes in the telogen  
21 and early anagen phases in mouse skin. We also identified IGN genes among a list of previously  
22 identified hair cycle-associated genes. Furthermore, our results suggest that IGN genes form part  
23 of a larger network and function predominantly as upstream regulators of hair cycle-regulated  
24 genes. Based on these *in silico* data, we propose a potential novel role of these 16 IGN genes as  
25 upstream regulators of hair cycle-associated genes. We speculate that IGN gene dysregulation  
26 participates in syndromes characterized by an impaired hair cycle. Thus, IGN gene expression  
27 might serve as a point of therapeutic intervention for patients suffering from cutaneous  
28 pathologies such as common hair-loss disorders.

## 29 2. Introduction

30 Genomic imprinting is an epigenetic regulatory mechanism that confers expression of selected  
31 genes from one parental allele, and thus, is independent of classical Mendelian inheritance <sup>1</sup>.  
32 Genomic imprinting is established in parental germline cells, and is maintained throughout  
33 mitotic cell division in somatic cells <sup>2</sup>. Thus far, 85 and 95 murine imprinted genes have been  
34 reported in the COXPRESdb and Gemma databases, respectively <sup>3</sup>. In mammals, imprinted  
35 genes are commonly identified in clusters located on specific chromosome regions <sup>4</sup>. The process  
36 of gene imprinting involves coordinated DNA and histone methylation, whereas the mechanisms  
37 underlying the selective targeting of a particular set of genes are largely unknown <sup>5</sup>. Altered  
38 expression of imprinted genes has been associated with the development of various pathological  
39 conditions in humans, including obesity, diabetes mellitus, muscular dystrophy, mental disability  
40 and neoplasms <sup>1</sup>.

41 Imprinted genes are functionally distinct, but most are involved in controlling the transition of  
42 cells between their quiescent, proliferative and/or differentiated states during fibroblast cell cycle  
43 withdrawal, adipogenesis *in vitro*, and muscle regeneration *in vivo* <sup>1</sup>. These genes function  
44 cooperatively in the regulation of specific biological pathways by forming co-expressed  
45 networks <sup>1</sup>. One of these subnetworks comprises 16 imprinted genes (hereafter referred to as the  
46 IGN genes) [cyclin-dependent kinase inhibitor 1C (*Cdkn1c*), decorin (*Dcn*), delta-like non-  
47 canonical notch ligand 1 (*Dlk1*), glycine amidinotransferase (*Gatm*), *GNAS* complex locus  
48 (*Gnas*), growth factor receptor-bound protein 10 (*Grb10*), imprinted maternally expressed  
49 transcript (*H19*), insulin-like growth factor 2 (*Igf2*), insulin-like growth factor 2 receptor (*Igf2r*),  
50 maternally expressed gene 3 (*Meg3*), mesoderm-specific transcript (*Mest*), necdin (*Ndn*),  
51 paternally expressed gene 3 (*Peg3*), PLAGL1-like zinc finger 1 (*Plagl1/Zac1*), sarcoglycan,  
52 epsilon (*Sgce*), and solute carrier family 38 member 4 (*Slc38a4*)]. A hallmark of gene networks  
53 is their ability to alter the expression of member genes in response to environmental changes.  
54 Several imprinted genes modify the expression of others within the same gene network. For  
55 example, *Plagl1/Zac1* controls embryonic growth by influencing the expression of *Igf2*, *H19*,  
56 *Cdkn1c* and *Dlk1* <sup>5</sup>. In addition, Gabory *et al.* demonstrated that *H19* gene knockout alters the  
57 expression of *Igf2*, *Cdkn1c*, *Gnas*, *Dlk1* and *Igf2r* in mice <sup>6</sup>. The majority of IGN genes are

58 expressed at high levels during embryonic and early postnatal life, but are silenced in the adult,  
59 except in muscle satellite cells, hematopoietic stem cells and skin stem cells<sup>5,7</sup>. In mouse skin  
60 tissue, it has been reported that *Cdkn1c*, *Dlk1*, *Grb10*, *H19*, *Igf2*, *Mest*, *Ndn*, *Peg3* and *Plagl1* are  
61 expressed at higher levels in epidermal stem cells compared to those in non-stem cells  
62 (keratinocytes)<sup>7</sup>. While imprinted genes have been shown to play a role in muscle regeneration  
63 and hematopoiesis, their functions in skin tissue are poorly understood<sup>8,9</sup>; thus, this was the  
64 focus of our study.

65 Skin stem cells are multipotent adult stem cells that can self-renew and differentiate into multiple  
66 cell lineages to form the different layers of the skin as well as the hair follicle. The cyclic activity  
67 of hair follicles organizes the growth and renewal of hair. During its life span, hair undergoes  
68 growth, degeneration and regeneration in concert with the activation and quiescence of  
69 epidermal stem cells located in the bulge of the hair follicle<sup>10,11</sup>. The cyclic activity of hair  
70 growth is divided into the anagen (growth), catagen (regression), and telogen (resting) phases<sup>12</sup>.  
71 Follicular stem cells are maintained in a quiescent state during the telogen phase. Once activating  
72 signals are received from upstream regulatory systems, a new cycle of hair growth is initiated  
73 (anagen phase)<sup>11,13,14</sup>. After the active growth phase, proliferating matrix cells in the hair  
74 follicles are induced to undergo coordinated apoptosis (catagen phase)<sup>12</sup>. Following the catagen  
75 phase, the hair follicles eventually undergo transition to the telogen phase, during which hairs are  
76 no longer produced due to inactivation of the follicular stem cells<sup>12</sup>.

77 In this study, we hypothesized that IGN genes play important roles in skin/hair biology  
78 throughout life (after birth) in addition to their well-known activity during embryonic/fetal  
79 growth. Thus, we aimed to identify the potential function of the 16 IGN genes in mouse skin  
80 tissue after birth by reanalyzing publicly available transcription profiles. Here, we exploited the  
81 curated large-scale datasets held in the NCBI GEO Profiles database. This public repository  
82 contains more than 70,000 transcriptome data series, with over 1.8 million individual profiles<sup>15</sup>  
83 and offers the option to examine the abundance of individual genes determined in hundreds of  
84 ‘omics’ studies. To identify datasets with changes in the abundance of IGN genes, we initially  
85 selected *H19* as a representative of imprinted genes because it is known to influence the  
86 expression of several other genes in the IGN<sup>16</sup>. We then assessed the expression profiles of all  
87 16 network-forming imprinted genes in datasets of interest. Using this strategy, we aimed to  
88 identify potential gaps in knowledge about IGN genes in skin biology based on changes in the  
89 corresponding RNA abundance with the long-term goal of supporting the development of novel  
90 therapies for skin disorders and hair-loss conditions.

### 91 **3. Results**

#### 92 **3.1 Identification of differential expression of *H19* in different stages of the hair cycle in** 93 **mouse skin**

94 To study the expression of IGN genes in mouse skin, we searched the NCBI GEO databank for a  
95 dataset that includes untreated, unaffected mouse skin samples. Using the search term ‘skin AND  
96 C3H/HeJ’, we identified dataset GSE45513 which contains three samples of skin transcription  
97 profiles from 10-week-old C3H/HeJ mice. Analysis of GSE45513 with the webtool GEO2R  
98 revealed expression of all 16 IGN genes in the mouse skin samples (Fig. 1).

99 To identify publicly available datasets in which members of the IGN could be examined in the  
100 skin, we searched for one IGN gene *H19* using the search term ‘H19[*gene symbol*], AND skin’  
101 in the NCBI GEO Profiles database<sup>17</sup>. In this search, 156 datasets were identified. These datasets  
102 were manually curated for differential expression of *H19* across all samples within a dataset  
103 based on the visual gene expression level displayed in the GEO Profiles and using the GEO2R  
104 tool. Using this strategy, we identified dataset GSE11186<sup>18</sup>, which contains the transcriptomic  
105 profiles of the different stages of the first and second synchronized natural and depilation-  
106 induced growth cycles of hair follicles from mouse skin biopsies analyzed by Affymetrix array  
107 hybridization. The time-points representing the different phases of the synchronized hair growth  
108 cycle were classified by Lin *et al.* based on established morphological guidelines<sup>19</sup>. In this  
109 dataset, *H19* expression was significantly elevated in the second telogen phase (day 44)  
110 compared to the mid-anagen (day 27) or catagen (days 37 and 39) phases (Fig. 2). As dataset  
111 GSE11186 contained only two samples for the first telogen phase (day 23), it was not included in  
112 this analysis

113 This result prompted us to analyze the gene expression of all 16 IGN genes in the complex  
114 architecture of the hair follicle. Using the query ‘skin hair follicle’ to search the GEODataSet  
115 database, we identified dataset GSE3142, which contains the expression profiles of dermal  
116 papilla cells, skin fibroblasts, melanocytes, hair follicle matrix cells and outer root sheath cells  
117 from the dorsal skin of 4-day-old CD-1 mice<sup>20</sup>, which represents the initial hair follicle  
118 morphogenesis stage. Our analysis revealed expression of all 16 IGN genes in the studied cell  
119 fractions of the hair follicle (Supplemental Fig. S1).

### 120 **3.2 IGN gene expression is elevated during the telogen phase of the hair cycle**

121 *H19* belongs to a network of 16 imprinted genes (*Cdkn1c*, *Dcn*, *Dlk1*, *Gatm*, *Gnas*, *Grb10*, *H19*,  
122 *Igf2*, *Igf2r*, *Meg3*, *Mest*, *Ndn*, *Peg3*, *Plagl1*, *Sgce*, and *Slc38a4*) co-expressed as part of an IGN  
123 that is regulated at the transition from proliferation to quiescence<sup>1,5</sup>. *H19* knockout was shown to  
124 perturb the expression of five other IGN genes (*Igf2*, *Cdkn1c*, *Gnas*, *Dlk1* and *Igf2r*) at the  
125 transcriptional levels<sup>6</sup>. Thus, in addition to *H19*, we next examined the normalized signal  
126 intensity values of each of the 16 individual IGN genes during the telogen (day 23) and mid-  
127 anagen (day 27) phases of the synchronized second postnatal hair cycle in the GSE11186 dataset.  
128 For comparison, we also examined the absolute expression of six known telogen-activated genes  
129 (*Ar*, *Esr1*, *Lhx2*, *Nr1d1*, *Sox18*, and *Stat3*), and six known telogen-repressed genes (*Elf5*, *Foxn1*,  
130 *Grhl1*, *Lef1*, *Msx2*, and *Vdr*)<sup>18</sup>. We observed that the median IGN gene expression in the telogen  
131 phase was elevated compared to that in the mid-anagen phase. This trend was less marked for  
132 *Dcn* and *Igf2r*. Some of the IGN genes (i.e., *Gnas*, *H19*, *Meg3* and *Plagl1*) were expressed at  
133 even higher levels than the known telogen-activated genes (Fig. 3A).

134 Next, we calculated the fold-change in gene expression during the telogen phase (day 23)  
135 compared with that in the catagen phase (days 37 and 39) and during the anagen phase (day 27)  
136 compared with that in the catagen (days 37 and 39) phase using the normalized signal intensity  
137 values for each IGN member gene provided in GSE11186. We found a significant difference in  
138 the mean expression ratio of 14 IGN member genes (*Cdkn1c*, *Dlk1*, *Gatm*, *Gnas*, *Grb10*, *H19*,  
139 *Igf2*, *Meg3*, *Mest*, *Ndn*, *Peg3*, *Plagl1*, *Sgce*, and *Slc38a4*) when comparing the telogen/catagen  
140 ratio versus the mid-anagen/catagen ratio (Fig. 3B). Two of the panel of 16 IGN genes (*Dcn* and  
141 *Igf2r*) did not follow this trend (Fig. 3B).

142 In summary, our analysis shows that like *H19*, IGN genes are, in general, expressed at higher  
143 levels in the telogen phase compared to those in the anagen phase.

### 144 **3.3 Most IGN genes are expressed periodically and are considered hair cycle-regulated** 145 **genes**

146 To assess whether the IGN genes are hair cycle-regulated, we took advantage of a publicly  
147 available dataset that was obtained after processing mouse skin mRNA microarray data obtained  
148 at eight time-points corresponding to the first synchronous (days 1, 6 and 14: anagen phase, day  
149 17: catagen, day 23: telogen) and asynchronous (9<sup>th</sup> week, 5<sup>th</sup> month, 1<sup>st</sup> year) periods of  
150 postnatal hair cycling<sup>21</sup>. While the skin patches of the synchronous samples were collected at  
151 defined hair growth stages (anagen, catagen, telogen), the samples obtained during the  
152 asynchronous periods contain skin tissue at different phases of the hair cycle<sup>21</sup>. Skin samples  
153 from synchronized and asynchronous hair cycle stages were included in order to distinguish  
154 changes in gene expression associated specifically with the hair cycle from non-cyclic changes in  
155 expression occurring simultaneously in the skin<sup>21</sup>. After excluding genes that were not expressed  
156 in the mouse skin and applying a computational approach including replicate variance analysis  
157 (*F*-test), Lin *et al.* identified a dataset of 2,461 probe sets corresponding to 2,289 potential hair  
158 cycle-associated genes (hereafter referred to as the Lin1-dataset; Table S1)<sup>21</sup>. The *P*-value cut-  
159 off for the *F*-test was set previously to 0.05, as it was found that >80% of known genes  
160 exhibiting hair cycle-dependent expression had a *P*-value of <0.05 determined using this  
161 computational approach<sup>21</sup>. As the pool of these 2,289 hair cycle-associated genes was restricted  
162 to protein-coding genes, only the 14 protein-coding IGN genes (*Igf2*, *Cdkn1c*, *Dcn*, *Dlk1*, *Gatm*,  
163 *Gnas*, *Grb10*, *Igf2r*, *Ndn*, *Mest*, *Peg3*, *Plagl1*, *Sgce* and *Slc38a4*) were included in our analysis  
164 and the two non-coding RNA IGN genes (*H19* and *Meg3*) were excluded. Among the pool of  
165 2,461 probe sets categorized as periodically expressed, hair cycle-regulated genes in mouse  
166 dorsal skin, we identified 10 IGN genes (*Cdkn1c*, *Dcn*, *Dlk1*, *Gatm*, *Gnas*, *Igf2r*, *Ndn*, *Peg3*,  
167 *Sgce*, and *Slc38a4*), corresponding to 71% of all protein-coding IGN genes (Fig. 4A). The  
168 previous cluster analysis of the Lin1-dataset revealed three general expression profile patterns,  
169 characterized as ‘anti-hair growth’-, ‘hair growth’-, and ‘catagen’-related, which were further  
170 subdivided into 30 sub-clusters of co-expressed genes with expression peaks at different stages  
171 of the hair cycle<sup>21</sup>. Seven of the hair cycle-associated IGN genes (*Cdkn1c*, *Dlk1*, *Gnas*, *Peg3*,  
172 *Gatm*, *Ndn*, and *Slc38a4*) identified in our study were grouped in the ‘anti-hair growth’ category  
173 and showed a decline in expression levels during the anagen phase. *Igf2r* was categorized as a  
174 ‘hair growth’ gene, with peak expression early in the anagen phase. In contrast, *Sgce* was  
175 categorized as a ‘catagen-related’ gene, with a decrease in expression during the catagen phase.  
176 Only one IGN gene (*Dcn*) belonged to a gene cluster that could not be categorized according to  
177 the three main profile patterns (Table 1).

178 Next, we analyzed an independent dataset (previously reported by Lin *et al.* and hereafter  
179 referred to as the Lin2-dataset; Table S2), which comprises a set of 6,393 mRNA probe sets and  
180 corresponds to a pool of 4,704 genes<sup>18</sup> identified by processing expression data obtained from  
181 mRNA profiles of mouse dorsal skin collected at multiple time-points during: 1) the postnatal  
182 completion of hair follicle morphogenesis, including the first catagen and telogen phases; 2) the  
183 synchronized second postnatal hair growth cycle; and 3) a depilation-induced hair growth cycle  
184<sup>18</sup>. By applying a matrix model, 8,433 periodically expressed probe sets (6,010 genes) were  
185 identified, of which 2,040 (1,306 genes) were excluded from this subset since the changes in the

186 expression of these genes was due to alterations in the cell type composition of the skin during  
187 hair growth (such as cornified cells, suprabasal cells, mesenchymal cells and myocytes)<sup>18</sup>. The  
188 final set of 6,393 probe sets (4,704 genes, Lin2-dataset) exhibited periodic expression patterns  
189 that cannot be explained by cell type specific alterations that occur in the skin during hair growth  
190 and were thus defined as hair cycle-regulated genes<sup>18</sup>. Similar to the Lin1-dataset, this set of  
191 4,704 hair cycle-regulated genes was restricted to protein-coding genes. Thus, we included only  
192 the 14 protein-coding IGN genes in our analysis and excluded the two non-coding RNA IGN  
193 genes (*H19* and *Meg3*). We identified eight IGN genes (*Igf2*, *Cdkn1c*, *Dcn*, *Dlk1*, *Gnas*, *Mest*,  
194 *Peg3*, and *Plagl1*) (corresponding to 57% of all the protein-coding IGN genes) among the pool  
195 of 6,347 probe sets in the Lin2-dataset that were categorized as periodically expressed, hair  
196 cycle-regulated genes in mouse dorsal skin (Table 2)<sup>18</sup>. A total of 3,180 genes from the Lin2-  
197 dataset were grouped previously according to their expression peak during the hair growth cycle,  
198 with 1,169 genes in the early anagen phase, 1,017 in the mid-anagen phase, 243 in the late  
199 anagen phase, 208 in the early catagen phase, 253 in the mid-catagen phase and 290 in the  
200 telogen phase<sup>18</sup>. The eight IGN genes identified in this study that were included in the hair  
201 cycle-regulated genes of the Lin2-dataset were categorized as genes with an expression peak in  
202 the telogen phase (*Dcn*, and *Gnas*) and the early anagen phase (*Igf2*, *Cdkn1c*, *Dlk1*, *Mest*, *Peg3*,  
203 and *Plagl1*) (Table 2). Furthermore, we examined the expression levels of the eight hair cycle-  
204 regulated IGN genes (listed in Table 2) during the nine time-points provided in the ‘Lin2-dataset’  
205<sup>18</sup>. The eight hair cycle-regulated IGN genes show elevated expression profiles in the telogen and  
206 early anagen phases compared to the mid/late anagen and catagen phases (Fig. 4B). This  
207 expression pattern is similar to that of *Dbp*, *Nr1d1*, *Per1*, *Per2*, and *Tef*, which form a co-  
208 expressed cluster of transcription factors known to be elevated during the telogen phase<sup>18</sup>. In  
209 contrast, their expression patterns differed from those of *Dlx3*, *Elf5*, *Foxn1*, *Foxq1*, *Hoxc13*, and  
210 *Ovoll*, a group of key transcriptional regulators with known peaks in expression from the mid-  
211 anagen to late catagen phase<sup>18</sup>. In summary, our analysis shows that the majority of IGN genes  
212 are among two independently identified datasets<sup>18,21</sup> containing hair cycle-regulated genes, the  
213 expression of which is not linked to cell type specific alterations that occur in the skin during the  
214 hair cycle. In addition, we identified the IGN genes among ‘Telogen’ and ‘Early Anagen’ genes  
215 grouped by Lin *et al.* using statistical differential analysis<sup>18</sup>.

### 216 **3.4 Network analysis reveals a potential role of IGN genes as upstream regulators of hair** 217 **cycle-associated genes**

218 Hair follicle development and regeneration *in vitro* are strictly regulated by various growth  
219 factors, hormones and signaling molecules, with the Wnt signaling pathway being one of the  
220 most important<sup>22-26</sup>. A study reported by Zhu *et al.* indicated that H19 maintains the hair follicle-  
221 inducing ability of dermal papilla cells through activation of the Wnt pathway<sup>27</sup>. Therefore, we  
222 explored the potential function of the 16 IGN genes as upstream regulators of hair cycle-  
223 associated genes. For this purpose, we performed IPA using the hair cycle-associated genes  
224 listed in Table S1 as input to identify potential upstream regulators of these genes. We  
225 successfully identified eight IGN genes (*Cdkn1c*, *Dcn*, *Gnas*, *Grb10*, *H19*, *Igf2*, *Igf2r*, and  
226 *Plagl1*) among the predicted upstream regulators of hair cycle-associated genes (Supplemental  
227 Fig. S2, Table S3).

228 To further explore the relationships of all 16 IGN genes and to identify potentially associated  
229 biological functions, we used the IPA application to perform a network analysis with all 16 IGN

230 genes as input. Using this strategy, we identified a larger gene network comprising 35 genes, of  
231 which 12 were IGN genes (*Cdkn1c*, *Dcn*, *Dlk*, *Gatm*, *Gnas*, *Grb10*, *H19*, *Igf2*, *Igf2r*, *Meg3*, *Ndn*,  
232 *Plagl1*) (Table S4, Fig. 5). In the IPA, this network of genes was predicted to be associated with  
233 ‘Dermatological Diseases and Conditions’ in the ‘Top Diseases and Functions’ category. To  
234 explore potential functions of this network further, we sought to determine whether these 35  
235 genes were among the hair cycle-associated genes listed in Table S1. Our analysis revealed that  
236 10 genes from this network had previously been identified as hair cycle-associated genes (Table  
237 S4). Further analysis revealed that 27 of the 35 genes in the larger IGN network were among the  
238 potential upstream regulators of the hair cycle-associated genes listed in Table S3 (Table S4 and  
239 Fig. 5).

240 Finally, we explored potential downstream functions of the 16 telogen/early anagen-activated  
241 IGN genes using the canonical pathway analysis tool in the IPA application. We identified 10  
242 canonical pathways in which seven (*Dcn*, *Gatm*, *Gnas*, *H19*, *Igf2*, *Igf2r*, and *Ndn*) of the 16 IGN  
243 genes were significantly enriched based on a  $-\log(P\text{-value}) > 1.3$  (Table 3). These canonical  
244 pathways included hormone signaling pathways, such as the estrogen receptor pathway, which  
245 was previously shown to regulate the transition from the telogen phase to the anagen phase in  
246 hair follicles<sup>28</sup>, as well as several metabolism- and signaling-related pathways such as the  
247 glycine degradation (creatine biosynthesis) pathway and ephrin B signaling (Table 3).

#### 248 **4. Discussion**

249 The 16 IGN genes examined in this study are known to play important roles in embryonic  
250 development<sup>5,29</sup>. In this study, we investigated the involvement of this particular set of imprinted  
251 genes in the growth cycle of hair follicles and the underlying mechanisms that regulate the  
252 expression of hair cycle-associated genes. We identified a coordinated elevation in the  
253 expression of these IGN genes in the telogen and early anagen phases compared to the mid-  
254 anagen phase of the hair cycle. In addition, we identified most IGN genes among a list of  
255 previously reported hair cycle-associated genes. Our analysis showed that IGN genes form a  
256 network with other genes, most of which most were characterized as upstream regulators of hair  
257 cycle-associated genes. In addition, our gene enrichment analysis using IPA predicted eight of  
258 the 16 IGN genes as potential upstream regulators of hair cycle-associated genes. Thus, our  
259 findings indicate a potential novel role of IGN genes as upstream regulators of hair cycle-  
260 associated genes.

261 Patterns of gene expression in hair follicle stem cells have been reported previously<sup>30,31</sup> as well  
262 as time-course profiling of the expression in the skin to identify hair cycle-associated genes,  
263 including the dataset reported by Lin *et al.* that was used for the analysis in our study<sup>21</sup>.  
264 However, synchronous, coordinated hair cycle-associated changes in the expression of IGN  
265 genes have not been described previously. Our analysis of the cyclic expression of IGN genes in  
266 hair follicles as well as their potential functions as upstream regulators of hair cycle-regulated  
267 genes highlight the vital role of IGN genes in skin/hair homeostasis<sup>7</sup>. Interestingly, a recent  
268 study has shown that *H19* overexpression activates the Wnt signaling pathway, resulting in  
269 maintenance of the hair follicle regeneration potential<sup>32</sup>. This activity of H19 may, to some  
270 extent, contribute to the molecular mechanisms underlying our findings indicating that *H19* and  
271 other IGN genes function as potential upstream regulators of hair cycle-regulated genes.. In  
272 addition, Iglesias–Bartolome *et al.* showed that the *GNAS* gene product, which we identified as a

273 potential telogen-activated upstream regulator of hair cycle-regulated genes, limits the  
274 proliferation of epidermal stem cells and is involved in maintaining hair follicle homeostasis<sup>33</sup>.  
275 Moreover, we identified *Dcn*, a member of the IGN, as an upstream regulator of hair cycle-  
276 regulated genes (see Table S3 and Fig. 5). Exogenous administration of its gene product, decorin,  
277 was shown to accelerate the anagen phase and delay catagen phase transition, and was  
278 categorized as a positive regulator of the hair growth cycle<sup>34</sup>. It has also been shown that  
279 physiologic concentrations of *Igf2*, which is among our predicted upstream regulators of hair  
280 cycle-associated genes (Table S3), is a potent stimulator of hair growth<sup>35</sup>. Furthermore, absence  
281 of *Igf2* results in premature entry into a catagen-like stage<sup>35</sup>. Thus, in accordance with our  
282 conclusions, *Igf2* was suggested to be an important regulator of the hair cycle<sup>35</sup>.

283 Interestingly, most genes in the larger network of regulatory IGN genes identified in this study  
284 (27 of 35 genes) were identified as potential upstream regulators of hair cycle-associated genes  
285 (Table S3, S4 and highlighted in red in Fig. 5). Among the genes predicted to be directly  
286 regulated by the IGN, we identified several known to be associated with regulation of the hair  
287 cycle, including *Akt*, *Erk*, *Pi3k*, and *Vegf* (Fig. 5). Indeed, the PI3K-Akt signaling pathway plays  
288 a crucial role in *de novo* hair follicle regeneration<sup>36</sup>, while vascular endothelial growth factor  
289 (*Vegf*) induces proliferation of hair follicle cells through activation of ERK<sup>37</sup>.

290 The IGN genes examined in this study are downregulated postnatally, but are constitutively  
291 expressed in pluripotent stem cells and/or progenitor cells of the hematopoietic system, skin and  
292 skeletal muscles, with significantly lower expression levels in their differentiated progeny<sup>7</sup>.  
293 Somatic stem cells, such as hematopoietic stem cells, epidermal stem cells and satellite cells of  
294 the skeletal muscles are generally considered to be quiescent, dividing infrequently, but are  
295 driven into active proliferation/differentiation cycles during tissue regeneration or self-renewal<sup>7</sup>.  
296 Our results suggest periodic expression of the IGN genes during the follicular growth cycle, with  
297 peak expression in the telogen and early anagen phases and the lowest expression in the mid-  
298 anagen and catagen phases. These findings are consistent with the consensus that hair follicle  
299 stem cells receive activating or inhibitory signals at distinct stages of the hair growth cycle,  
300 allowing them to either remain quiescent or become proliferative<sup>38</sup>. During the transition from  
301 the telogen phase to the anagen phase, biological signals from the dermal papilla stimulate the  
302 quiescent follicular stem cells to proliferate<sup>39</sup>. Melanocytes, which are important components of  
303 hair follicles that produce hair color, are also activated at specific phases of the hair growth  
304 cycle, supplying progeny to the hair matrix, where most mature into differentiated melanocytes  
305<sup>40,41</sup>. As most of the IGN genes have the potential to function as tumor suppressors, it is likely  
306 that the decrease in their expression from the telogen phase to the anagen phase triggers  
307 biological cascades that stimulate cell proliferation in melanocytes<sup>42-52</sup>. Interestingly, H19  
308 downregulation was shown to stimulate melanogenesis in melasma, a hyperpigmentation  
309 condition resulting from an increase in melanin pigment production<sup>53</sup>. Moreover, it can be  
310 speculated that dysregulated IGN gene expression plays roles in the development of some of the  
311 manifestations of several congenital syndromes characterized by impaired hair growth cycles,  
312 including short anagen hair syndrome<sup>54</sup>, which is associated with a synchronized pattern of scalp  
313 hair growth,<sup>55</sup> and androgenic alopecia, which is a very common type of hair-loss<sup>32</sup>. As H19  
314 overexpression was shown to activate Wnt signaling to maintain the hair follicle regeneration  
315 potential, it has already been suggested that H19 could be a target for treatment of androgenetic  
316 alopecia<sup>27</sup>.



317 The limitations of our study should be noted. Our study was designed to examine the potential  
318 function of the 16 IGN genes in mouse skin tissue after birth by reanalyzing publicly available  
319 transcription profiles. Thus, this study consists of a *in silico* analysis of these 16 IGN genes, but  
320 does not include wet-lab characterization and functional analysis. Not only is the hair follicle a  
321 complex mini-organ that presents some challenges to wet-lab investigations, but the  
322 complementary and contrasting functions of the proteins encoded by the IGN genes represent a  
323 challenge in determining their individual functions in the hair cycle. In-depth studies might  
324 require the simultaneous knockout of different combinations of the coordinately expressed  
325 network genes as a single gene might not alter the integrity of the entire network. Nevertheless,  
326 we consider that our *in silico* analysis of several independent datasets supports the conclusion  
327 that IGN genes are periodically expressed in a coordinated manner during the hair cycle and  
328 might participate in syndromes characterized by an impaired hair cycle when dysregulated.

329 In summary, we have shown that the majority of genes belonging to the IGN show synchronous,  
330 coordinated expression in mouse skin during the hair cycle, with elevated expression in the  
331 telogen and early anagen phases. In addition, we revealed that IGN genes form part of a larger  
332 network including non-imprinted genes together may function as upstream regulators of hair  
333 cycle-regulated genes. Based on our findings, we propose a novel role for IGN genes in  
334 regulating progression of the hair cycle. Our observation that IGN genes are more abundantly  
335 expressed in the telogen and early anagen phases indicates a possible role for IGN genes in the  
336 control of this stage of the hair cycle.

## 337 5. Materials and Methods

### 338 Dataset search and analysis:

339 To identify publicly available transcription profile data of untreated and unaffected mouse skin,  
340 we used the query 'skin AND C3H/HeJ' to search the NCBI GEO DataSets, a public genomics  
341 data repository<sup>56</sup>. We included the search term C3H/HeJ, as this is a general-purpose strain of  
342 mice used in a wide variety of research areas. Using this strategy, we identified GSE45513,  
343 which contains skin expression profiles of three 10-week-old untreated and unaffected C3H/HeJ  
344 mice<sup>57</sup>. This dataset is provided as normalized signal intensity (log2) values. For the analysis of  
345 IGN gene expression in GSE45513, we used the interactive webtool GEO2R<sup>58</sup>; see 'Dataset  
346 analyses using GEO2R'. The following probes were used to evaluate expression of the genes  
347 indicated: 1417649\_at (*Cdkn1c*), 1441506\_at (*Dcn*), 1449939\_at (*Dlk1*), 1423569\_at (*Gatm*),  
348 1450186\_s\_at (*Gnas*), 1425458\_a\_at (*Grb10*), 1448194\_a\_at (*H19*), 1448152\_at (*Igf2*),  
349 1424112\_at (*Igf2r*), 1452905\_at (*Meg3*), 1423294\_at (*Mest*), 1415923\_at (*Ndn*), 1417356\_at  
350 (*Peg3*), 1426208\_x\_at (*Plagl1*), 1420688\_a\_at (*Sgce*), and 1428111\_at (*Slc38a4*). The mean of  
351 the normalized signal intensity values of all three biological repeats for each IGN gene was  
352 calculated using GraphPad Prism (GraphPad Prism version 9.2.0 for Windows, GraphPad  
353 software, San Diego, CA USA).

354 To identify datasets in which our genes of interest (16 IGN genes) are differentially expressed,  
355 we used the query 'H19[gene symbol] AND skin' to search the NCBI GEO Profiles<sup>59</sup>. This  
356 database stores gene expression data derived from the curated GEO datasets<sup>56</sup>. Using our  
357 specific query, we identified expression profiles (presented as charts of transcriptomic datasets)  
358 containing samples with differentially expressed *H19* levels across all samples within each  
359 dataset. We then curated the filtered datasets based on differential gene expression of *H19*

360 visually as well as using the NCBI GEO2R tool<sup>60</sup>; see ‘Dataset analysis using GEO2R’. Using  
361 this strategy, we identified GSE1912 (Lin1 dataset)<sup>21</sup> and GSE11186 (Lin2 dataset)<sup>18</sup> which  
362 contain expression profiles of mouse dorsal skin at different stages of the synchronized and  
363 unsynchronized hair cycle. The expression profiles are provided as normalized signal intensity  
364 values (linear). The same probe IDs as listed above for the analysis of GSE45513 were used to  
365 analyze the Lin1 and Lin2 datasets.

366 To study the gene expression of the IGN genes in the different cell types of the hair follicle, we  
367 used the query ‘skin hair follicle’ in the GEODataSet database search, which was restricted to the  
368 organism ‘mouse’. This search revealed GSE3142<sup>20</sup>, a dataset that contains microarray  
369 expression profiles of hair follicle matrix cells, outer root sheath cells, dermal papilla cells, and  
370 melanocytes as well as a dermal fraction enriched in fibroblasts from the dorsal skin of 4-day-old  
371 CD-1 mice. Data values of GSE3142 are provided as normalized signal intensity values (log<sub>2</sub>).  
372 For the analysis of IGN gene expression in GSE3142, we downloaded the normalized signal  
373 intensity data (log<sub>2</sub>) and used GEO2R to determine the normalized signal intensity values for  
374 each of the 16 IGN genes in both biological replicates. The same probe IDs as listed above for  
375 the analysis of GSE45513 were used to analyze GSE3142. Finally, we calculated the mean of the  
376 two signal intensity values for each gene and created the superimposed scatter plot in GraphPad  
377 Prism 9.2.0.

378 Dataset analysis using GEO2R: After grouping the samples in GEO2R, the analysis was  
379 performed and dataset quality was assessed by the generated graphical plots provided in GEO2R.  
380 In brief, these comprised: 1) a volcano plot, generated using limma, displaying statistical  
381 significance versus magnitude of change to visualize differentially expressed genes; 2) a mean  
382 difference plot displaying log<sub>2</sub> fold-change versus average log<sub>2</sub> expression values to visualize  
383 differentially expressed genes; 3) a boxplot, generated using R boxplot, to view the distribution  
384 of the values of the selected samples; and 4) an expression density plot, generated using R  
385 limma, to view the distribution of the values in the selected samples. If dataset quality was  
386 satisfactory, the full table of normalized signal intensity values, including probe IDs and gene  
387 names, was downloaded. The probe IDs for each of the 16 IGN genes were determined. The  
388 probe IDs were entered sequentially into the search field in the Profile Graph tab in GEO2R and  
389 the normalized signal intensity values for the samples of interest were copied into GraphPad  
390 9.2.0. to generate a graphical plot.

391 Statistical comparison of *H19* expression levels among three different growth phases of hair  
392 follicles was performed with the non-parametric Kruskal–Wallis test<sup>61</sup> and the Dunnnett multiple  
393 comparison post-hoc test<sup>62</sup>. The results were adjusted for multiple hypothesis testing with a  
394 Benjamini–Hochberg (fdr) procedure<sup>63</sup> Comparison of two ratios was performed with the non-  
395 parametric Wilcoxon test. Comparison of *Dcn* and *Gnas* expression between anagen and telogen  
396 from dataset GSE129218 was performed using the unpaired t-Test. A *P*-value ≤ 0.05 was  
397 considered statistically significant. Analyses were performed using R version 4.0.4.

398 Skin tissue sample collection and microarray experiments:

399 Dataset GSE4553 generation: The authors of GSE45513 isolated total RNA from skin samples  
400 of three 10-week-old untreated and unaffected C3H/HeJ mice. This was converted to cDNA and  
401 hybridized onto Mouse Genome 430 2.0 gene chips. Microarray quality control and

402 preprocessing were performed by the authors of GSE45513 using Bio Conductor in R and RMA  
403 normalization.

404 Dataset GSE11186 generation: Dataset GSE11186 was generated by Lin *et al.*<sup>18</sup> in a microarray  
405 analysis of mouse dorsal skin samples obtained at postnatal time-points representative of the  
406 second synchronized hair cycle: day 23 (telogen), day 27 (mid-anagen), day 37–39 (catagen),  
407 and day 44 (telogen). Multiple biological replicates were profiled for each time-point (telogen  
408 day 23: n = 2; mid-anagen day 27: n = 3; catagen day 37–39: n = 6; telogen day 44: n = 3). In  
409 brief, fragmented biotinylated cRNA was hybridized on GeneChip Drosophila Genome Arrays.  
410 The authors of GSE11186 analyzed the microarray data with Microarray Suite version 5.0 (MAS  
411 5.0) using Affymetrix default analysis settings and global scaling as the normalization method.  
412 Histological sections were used to classify each skin sample into specific phases/stages of the  
413 hair cycle based on established morphological guidelines<sup>19</sup>.

414 Dataset GSE3142 was generated by Rendl *et al.*<sup>20</sup> in a microarray analysis of five cell types  
415 isolated from mouse dorsal skin samples. Briefly, Rendl *et al.* FACS-sorted hair follicle matrix  
416 cells, outer root sheath cells, dermal papilla cells, and melanocytes as well as a dermal fraction  
417 enriched in fibroblasts from dorsal skin samples from 4-day old Lef1-RFP/K14-H2BGFP mice.  
418 Two biological replicates of each cell type were generated. Total RNA isolated from each cell  
419 type was reverse-transcribed and biotinylated cRNA was hybridized to mouse genome array  
420 MOE 430a (Affymetrix). Microarray data processing was performed using the Affymetrix  
421 Microarray Suite version 5.0, scaled with the Affymetrix mask file set to TGT = 500.

422 Identification and classification of hair cycle-associated genes: Hair cycle genes were identified  
423 by Lin *et al.*<sup>21</sup> using data from a microarray analysis study including dorsal skin samples  
424 collected from CB6F1 mice at defined time-points during the synchronized stages of the hair  
425 cycle, as well as data from asynchronized skin samples. Histological sections were used to  
426 classify each sample of the synchronized stages of the hair cycle based on established  
427 morphological guidelines<sup>19</sup>. Computational methods were then used to identify the set of genes  
428 expressed within the skin that are associated specifically with the hair growth cycle<sup>21</sup>.

429 Ingenuity pathway analysis:

430 To identify potential upstream regulators, including transcription factors and any gene or small  
431 molecule that has been reported to affect gene expression experimentally, we used the web-based  
432 application Ingenuity Pathway Analysis (IPA, Ingenuity Systems Inc, Redwood City, CA, USA,  
433 version 62089861)<sup>64</sup>. The upstream regulator analysis in the IPA application is based on prior  
434 knowledge of expected effects between transcriptional regulators and their target genes stored in  
435 the Ingenuity Knowledge Base<sup>65</sup>. For this analysis, we uploaded the dataset of interest to the  
436 IPA application and performed a ‘Core Analysis’ using the Ingenuity Knowledge Base as a  
437 reference set and the ‘Upstream Regulator’ analytics. Similarly, the network analysis was  
438 generated using the 16 IGN genes as input data, performing a ‘Core analysis’ and using the  
439 ‘Networks’ analysis tool option in IPA. Using the same Core analysis of the 16 IGN genes, we  
440 also performed a canonical pathway analysis using the ‘Canonical Pathways’ tab in the IPA  
441 application. The resulting  $-\log(P\text{-values})$  were calculated by the IPA software using Fisher’s  
442 exact test to determine the probability that the association between the IGN genes and the

443 identified canonical pathways is due to chance alone. A  $-\log(P\text{-value})$  of  $\geq 1.3$  was considered  
444 statistically significant.

445

446

## 447 6. References

- 448 1 Al Adhami, H. *et al.* A systems-level approach to parental genomic imprinting: the imprinted  
449 gene network includes extracellular matrix genes and regulates cell cycle exit and  
450 differentiation. *Genome Res* **25**, 353-367, doi:10.1101/gr.175919.114 (2015).
- 451 2 Wood, A. J. & Oakey, R. J. Genomic imprinting in mammals: emerging themes and established  
452 theories. *PLoS Genet* **2**, e147, doi:10.1371/journal.pgen.0020147 (2006).
- 453 3 Tucci, V., Isles, A. R., Kelsey, G., Ferguson-Smith, A. C. & Erice Imprinting, G. Genomic Imprinting  
454 and Physiological Processes in Mammals. *Cell* **176**, 952-965, doi:10.1016/j.cell.2019.01.043  
455 (2019).
- 456 4 Lewis, A. & Reik, W. How imprinting centres work. *Cytogenet Genome Res* **113**, 81-89,  
457 doi:10.1159/000090818 (2006).
- 458 5 Varrault, A. *et al.* Zac1 regulates an imprinted gene network critically involved in the control of  
459 embryonic growth. *Dev Cell* **11**, 711-722, doi:10.1016/j.devcel.2006.09.003 (2006).
- 460 6 Gabory, A. *et al.* H19 acts as a trans regulator of the imprinted gene network controlling growth  
461 in mice. *Development* **136**, 3413-3421, doi:10.1242/dev.036061 (2009).
- 462 7 Berg, J. S. *et al.* Imprinted genes that regulate early mammalian growth are coexpressed in  
463 somatic stem cells. *PLoS One* **6**, e26410, doi:10.1371/journal.pone.0026410 (2011).
- 464 8 Martinet, C. *et al.* H19 controls reactivation of the imprinted gene network during muscle  
465 regeneration. *Development* **143**, 962-971, doi:10.1242/dev.131771 (2016).
- 466 9 Benetatos, L. & Vartholomatos, G. Imprinted genes in myeloid lineage commitment in normal  
467 and malignant hematopoiesis. *Leukemia* **29**, 1233-1242, doi:10.1038/leu.2015.47 (2015).
- 468 10 Zhang, X. *et al.* Maintenance of high proliferation and multipotent potential of human hair  
469 follicle-derived mesenchymal stem cells by growth factors. *Int J Mol Med* **31**, 913-921,  
470 doi:10.3892/ijmm.2013.1272 (2013).
- 471 11 Leishman, E. *et al.* Foxp1 maintains hair follicle stem cell quiescence through regulation of Fgf18.  
472 *Development* **140**, 3809-3818, doi:10.1242/dev.097477 (2013).
- 473 12 Alonso, L. & Fuchs, E. The hair cycle. *J Cell Sci* **119**, 391-393, doi:10.1242/jcs02793 (2006).
- 474 13 Qiu, W. *et al.* Hair follicle stem cell proliferation, Akt and Wnt signaling activation in TPA-induced  
475 hair regeneration. *Histochem Cell Biol* **147**, 749-758, doi:10.1007/s00418-017-1540-1 (2017).
- 476 14 Kimura-Ueki, M. *et al.* Hair cycle resting phase is regulated by cyclic epithelial FGF18 signaling. *J*  
477 *Invest Dermatol* **132**, 1338-1345, doi:10.1038/jid.2011.490 (2012).
- 478 15 Rinchai, D., Kewcharoenwong, C., Kessler, B., Lertmemongkolchai, G. & Chaussabel, D. Increased  
479 abundance of ADAM9 transcripts in the blood is associated with tissue damage. *F1000Res* **4**, 89,  
480 doi:10.12688/f1000research.6241.2 (2015).
- 481 16 Monnier, P. *et al.* H19 lncRNA controls gene expression of the Imprinted Gene Network by  
482 recruiting MBD1. *Proc Natl Acad Sci U S A* **110**, 20693-20698, doi:10.1073/pnas.1310201110  
483 (2013).
- 484 17 <https://www.ncbi.nlm.nih.gov/geoprofiles/>.
- 485 18 Lin, K. K. *et al.* Circadian clock genes contribute to the regulation of hair follicle cycling. *PLoS*  
486 *Genet* **5**, e1000573, doi:10.1371/journal.pgen.1000573 (2009).

- 487 19 Muller-Rover, S. *et al.* A comprehensive guide for the accurate classification of murine hair  
488 follicles in distinct hair cycle stages. *J Invest Dermatol* **117**, 3-15, doi:10.1046/j.0022-  
489 202x.2001.01377.x (2001).
- 490 20 Rendl, M., Lewis, L. & Fuchs, E. Molecular dissection of mesenchymal-epithelial interactions in  
491 the hair follicle. *PLoS Biol* **3**, e331, doi:10.1371/journal.pbio.0030331 (2005).
- 492 21 Lin, K. K., Chudova, D., Hatfield, G. W., Smyth, P. & Andersen, B. Identification of hair cycle-  
493 associated genes from time-course gene expression profile data by using replicate variance. *Proc*  
494 *Natl Acad Sci U S A* **101**, 15955-15960, doi:10.1073/pnas.0407114101 (2004).
- 495 22 Andl, T., Reddy, S. T., Gaddapara, T. & Millar, S. E. WNT signals are required for the initiation of  
496 hair follicle development. *Dev Cell* **2**, 643-653, doi:10.1016/s1534-5807(02)00167-3 (2002).
- 497 23 Li, Y. H. *et al.* Adenovirus-mediated Wnt10b overexpression induces hair follicle regeneration. *J*  
498 *Invest Dermatol* **133**, 42-48, doi:10.1038/jid.2012.235 (2013).
- 499 24 Morioka, K., Arai, M. & Ihara, S. Steady and temporary expressions of smooth muscle actin in  
500 hair, vibrissa, arrector pili muscle, and other hair appendages of developing rats. *Acta Histochem*  
501 *Cytochem* **44**, 141-153, doi:10.1267/ahc.11013 (2011).
- 502 25 Myung, P. S., Takeo, M., Ito, M. & Atit, R. P. Epithelial Wnt ligand secretion is required for adult  
503 hair follicle growth and regeneration. *J Invest Dermatol* **133**, 31-41, doi:10.1038/jid.2012.230  
504 (2013).
- 505 26 Reddy, S. *et al.* Characterization of Wnt gene expression in developing and postnatal hair  
506 follicles and identification of Wnt5a as a target of Sonic hedgehog in hair follicle morphogenesis.  
507 *Mech Dev* **107**, 69-82, doi:10.1016/s0925-4773(01)00452-x (2001).
- 508 27 Zhu, N. *et al.* LncRNA H19 Overexpression Activates Wnt Signaling to Maintain the Hair Follicle  
509 Regeneration Potential of Dermal Papilla Cells. *Front Genet* **11**, 694,  
510 doi:10.3389/fgene.2020.00694 (2020).
- 511 28 Oh, H. S. & Smart, R. C. An estrogen receptor pathway regulates the telogen-anagen hair follicle  
512 transition and influences epidermal cell proliferation. *Proc Natl Acad Sci U S A* **93**, 12525-12530,  
513 doi:10.1073/pnas.93.22.12525 (1996).
- 514 29 Piedrahita, J. A. The role of imprinted genes in fetal growth abnormalities. *Birth Defects Res A*  
515 *Clin Mol Teratol* **91**, 682-692, doi:10.1002/bdra.20795 (2011).
- 516 30 Tumber, T. *et al.* Defining the epithelial stem cell niche in skin. *Science* **303**, 359-363,  
517 doi:10.1126/science.1092436 (2004).
- 518 31 Morris, R. J. *et al.* Capturing and profiling adult hair follicle stem cells. *Nat Biotechnol* **22**, 411-  
519 417, doi:10.1038/nbt950 (2004).
- 520 32 Ningxia Zhu, E. L., Huan Zhang, Yang Liu, Guiyuan Cao, Congcong Fu, Le Chen, Yang Zeng, Bozhi  
521 Cai, Yanping Yuan, Bin Xia, Keng Huang, and Changmin Lin. LncRNA H19 Overexpression  
522 Activates Wnt Signaling to Maintain the Hair Follicle Regeneration Potential of Dermal Papilla  
523 Cells. *Frontiers in Genetics* **11**, doi:10.3389/fgene.2020.00694 (2020).
- 524 33 Iglesias-Bartolome, R. *et al.* Inactivation of a Galpha(s)-PKA tumour suppressor pathway in skin  
525 stem cells initiates basal-cell carcinogenesis. *Nat Cell Biol* **17**, 793-803, doi:10.1038/ncb3164  
526 (2015).
- 527 34 Jing, J. *et al.* Expression of decorin throughout the murine hair follicle cycle: hair cycle  
528 dependence and anagen phase prolongation. *Exp Dermatol* **23**, 486-491, doi:10.1111/exd.12441  
529 (2014).
- 530 35 Philpott, M. P., Sanders, D. A. & Kealey, T. Effects of insulin and insulin-like growth factors on  
531 cultured human hair follicles: IGF-I at physiologic concentrations is an important regulator of  
532 hair follicle growth in vitro. *J Invest Dermatol* **102**, 857-861, doi:10.1111/1523-1747.ep12382494  
533 (1994).

- 534 36 Chen, Y. *et al.* PI3K/Akt signaling pathway is essential for de novo hair follicle regeneration. *Stem Cell Res Ther* **11**, 144, doi:10.1186/s13287-020-01650-6 (2020).
- 535
- 536 37 Li, W. *et al.* VEGF induces proliferation of human hair follicle dermal papilla cells through VEGFR-2-mediated activation of ERK. *Exp Cell Res* **318**, 1633-1640, doi:10.1016/j.yexcr.2012.05.003 (2012).
- 537
- 538
- 539 38 Lee, J. & Tumber, T. Hairy tale of signaling in hair follicle development and cycling. *Semin Cell Dev Biol* **23**, 906-916, doi:10.1016/j.semcdb.2012.08.003 (2012).
- 540
- 541 39 Gentile, P., Scioli, M. G., Bielli, A., Orlandi, A. & Cervelli, V. Stem cells from human hair follicles: first mechanical isolation for immediate autologous clinical use in androgenetic alopecia and hair loss. *Stem Cell Investig* **4**, 58, doi:10.21037/sci.2017.06.04 (2017).
- 542
- 543
- 544 40 Nishimura, E. K. *et al.* Dominant role of the niche in melanocyte stem-cell fate determination. *Nature* **416**, 854-860, doi:10.1038/416854a (2002).
- 545
- 546 41 Nishimura, E. K., Granter, S. R. & Fisher, D. E. Mechanisms of hair graying: incomplete melanocyte stem cell maintenance in the niche. *Science* **307**, 720-724, doi:10.1126/science.1099593 (2005).
- 547
- 548
- 549 42 Yoshimizu, T. *et al.* The H19 locus acts in vivo as a tumor suppressor. *Proc Natl Acad Sci U S A* **105**, 12417-12422, doi:10.1073/pnas.0801540105 (2008).
- 550
- 551 43 Yang, H. *et al.* NDN is an imprinted tumor suppressor gene that is downregulated in ovarian cancers through genetic and epigenetic mechanisms. *Oncotarget* **7**, 3018-3032, doi:10.18632/oncotarget.6576 (2016).
- 552
- 553
- 554 44 Piras, G. *et al.* Zac1 (Lot1), a potential tumor suppressor gene, and the gene for epsilon-sarcoglycan are maternally imprinted genes: identification by a subtractive screen of novel uniparental fibroblast lines. *Mol Cell Biol* **20**, 3308-3315 (2000).
- 555
- 556
- 557 45 Jarvinen, T. A. & Prince, S. Decorin: A Growth Factor Antagonist for Tumor Growth Inhibition. *Biomed Res Int* **2015**, 654765, doi:10.1155/2015/654765 (2015).
- 558
- 559 46 Kawakami, T. *et al.* Imprinted DLK1 is a putative tumor suppressor gene and inactivated by epimutation at the region upstream of GTL2 in human renal cell carcinoma. *Hum Mol Genet* **15**, 821-830, doi:10.1093/hmg/ddl001 (2006).
- 560
- 561
- 562 47 Takahashi, N., Yamaguchi, E., Kawabata, Y. & Kono, T. Deleting maternal Gtl2 leads to growth enhancement and decreased expression of stem cell markers in teratoma. *J Reprod Dev* **61**, 7-12, doi:10.1262/jrd.2014-089 (2015).
- 563
- 564
- 565 48 Algar, E. M. *et al.* Imprinted CDKN1C is a tumor suppressor in rhabdoid tumor and activated by restoration of SMARCB1 and histone deacetylase inhibitors. *PLoS One* **4**, e4482, doi:10.1371/journal.pone.0004482 (2009).
- 566
- 567
- 568 49 Oka, Y. *et al.* M6P/IGF2R tumor suppressor gene mutated in hepatocellular carcinomas in Japan. *Hepatology* **35**, 1153-1163, doi:10.1053/jhep.2002.32669 (2002).
- 569
- 570 50 Ross, R. J., Weiner, M. M. & Lin, H. PIWI proteins and PIWI-interacting RNAs in the soma. *Nature* **505**, 353-359, doi:10.1038/nature12987 (2014).
- 571
- 572 51 Mroue, R., Huang, B., Braunstein, S., Firestone, A. J. & Nakamura, J. L. Monoallelic loss of the imprinted gene Grb10 promotes tumor formation in irradiated Nf1+/- mice. *PLoS Genet* **11**, e1005235, doi:10.1371/journal.pgen.1005235 (2015).
- 573
- 574
- 575 52 Feng, W. *et al.* Imprinted tumor suppressor genes ARHI and PEG3 are the most frequently down-regulated in human ovarian cancers by loss of heterozygosity and promoter methylation. *Cancer* **112**, 1489-1502, doi:10.1002/cncr.23323 (2008).
- 576
- 577
- 578 53 Kim, N. H., Lee, C. H. & Lee, A. Y. H19 RNA downregulation stimulated melanogenesis in melasma. *Pigment Cell Melanoma Res* **23**, 84-92, doi:10.1111/j.1755-148X.2009.00659.x (2010).
- 579
- 580 54 Herskovitz, I., de Sousa, I. C., Simon, J. & Tosti, A. Short anagen hair syndrome. *Int J Trichology* **5**, 45-46, doi:10.4103/0974-7753.114711 (2013).
- 581

582 55 Thai, K. E. & Sinclair, R. D. Short anagen hair with persistent synchronized pattern of scalp hair  
583 growth. *J Am Acad Dermatol* **49**, 949-951, doi:10.1016/s0190-9622(03)00453-5 (2003).  
584 56 <https://www.ncbi.nlm.nih.gov/gds/>.  
585 57 Xing, L. *et al.* Alopecia areata is driven by cytotoxic T lymphocytes and is reversed by JAK  
586 inhibition. *Nat Med* **20**, 1043-1049, doi:10.1038/nm.3645 (2014).  
587 58 <https://www.ncbi.nlm.nih.gov/geo/info/geo2r.html>.  
588 59 <https://www.ncbi.nlm.nih.gov/geo/profiles/>.  
589 60 <https://www.ncbi.nlm.nih.gov/geo/geo2r/>.  
590 61 William H. Kruskal, W. A. W. Use of Ranks in One-Criterion Variance Analysis. *Journal of the*  
591 *American Statistical Association* **47:260**, 583-621, doi:10.1080/01621459.1952.10483441 (1952).  
592 62 C.W., D. A multiple comparison procedure for comparing several treatments with a control.  
593 *Journal of the American Statistical Association* **50**, 1096-1121 (1955).  
594 63 Benjamini Y., H. Y. Controlling the false discovery rate: a practical and powerful approach to  
595 multiple testing. *Journal of the Royal Statistical Society* **57**, 289-300 (1995).  
596 64 <https://www.qiagenbioinformatics.com/products/ingenuity-pathway-analysis>.  
597 65  
598 [http://pages.ingenuity.com/rs/ingenuity/images/0812%20upstream\\_regulator\\_analysis](http://pages.ingenuity.com/rs/ingenuity/images/0812%20upstream_regulator_analysis)  
599 [whitepaper.pdf](http://pages.ingenuity.com/rs/ingenuity/images/0812%20upstream_regulator_analysis).

600

## 601 **7. Acknowledgments**

602 The authors would like to thank Drs. D. Chaussabel, N. Marr, Dr. E. Chin-Smith and Jessica  
603 Tamanini for critically reading the manuscript. The authors would like to thank all the  
604 researchers who made their datasets public in the NCBI GEO.

## 605 **8. Author contributions**

606 AKM: conceptualization. SB, AKM: data curation, validation and visualization, data analysis  
607 and interpretation and methodology development. MT: data analysis. AKM: writing of the first  
608 draft. AKM, AIC, TK: writing, review and editing, MEA: statistical analysis. The contributor's  
609 roles listed above follow the Contributor Roles Taxonomy (CRediT) managed by The Consortia  
610 Advancing Standards in Research Administration Information (CASRAI)  
611 (<https://casrai.org/credit/>). All authors contributed to the article and approved the submitted  
612 version.

## 613 **9. Conflict of Interest**

614 The authors declare that the research was conducted in the absence of any commercial or  
615 financial relationships that could be construed as a potential conflict of interest.

## 616 **10. Funding**

617 The study was supported by a Sidra Medicine Internal Research Fund contribution to TK. The  
618 authors declare that no grants were involved in supporting this work.

## 619 11. Data availability

620 The datasets underlying the results are available in the NCBI GEO DataSets (GSE11186) at  
621 [ncbi.nlm.nih.gov/gds/](http://ncbi.nlm.nih.gov/gds/) as well as in the supplemental material of references <sup>18</sup> and of <sup>21</sup>.

## 622 12. Figure legends

623 **Fig. 1: All 16 IGN genes are expressed in the dorsal skin of mice.** Normalized signal intensity  
624 values (symbols) of all 16 IGN genes obtained from microarray data processed from skin  
625 samples of 10-week-old untreated and unaffected C3H/HeJ mice. The mean (horizontal line) of  
626 the normalized signal intensity values for each of the 16 IGN genes was calculated using the  
627 three biological repeats provided in GSE45513.

628 **Fig. 2. Time-course profile of *H19* expression during the synchronized second postnatal  
629 hair growth cycle.** Values shown are quantile normalized signal intensity data from GSE11186  
630 for the mid-anagen (day 27, n = 3), catagen (days 37 and 39, n = 6) and telogen (day 44, n = 3)  
631 phases. *P*-values shown were determined by Kruskal–Wallis analysis and Dunn’s test was used  
632 to determine which groups had significant differences \*:  $P \leq 0.05$ ; n: number of samples  
633 provided in GSE11186 and used in the analysis.

634 **Fig. 3. Expression of all 16 IGN genes in the telogen and anagen phases.** (A) Dot plot  
635 showing the quantile normalized signal intensity data for the IGN and control genes in the  
636 telogen (day 23) and anagen (day 27) phases in GSE11186. Each dot (telogen: gray and anagen:  
637 red) corresponds to a subject from the GSE11186 dataset. IGN genes are more commonly  
638 expressed in the telogen phase compared to the anagen phase. Known telogen-activated genes  
639 (*Ar*, *Esr1*, *Lhx2*, *Nr1d1*, *Sox18*, and *Stat3*) and telogen-repressed genes (*Elf5*, *Foxn1*, *Grhl1*,  
640 *Lef1*, *Msx2*, and *Vdr*) <sup>18</sup> were used as controls. (B) Fold-change in expression of all 16 pooled  
641 IGN genes identified in the telogen phase (T, day 23) and the mid-anagen phase (A, day 27)  
642 normalized to that in the catagen phase (C, day 37 and day 39) in the GSE11186 dataset. T/C-  
643 and A/C-values that correspond to the same gene are connected with a line to demonstrate that  
644 the A/C fold-change in expression is lower than the T/C fold-change in expression for all IGN  
645 genes except *Dcn* and *Igf2r*. Statistical comparison of T/C- and A/C-values was performed using  
646 the Wilcoxon test, \*\*\*\*\*:  $P < 0.01$ .

647 **Fig. 4. Most IGN genes are periodically expressed, hair growth cycle-regulated genes.** (A)  
648 Venn diagram illustrating that 71% of protein-coding IGN genes (10 of 14) are hair cycle-  
649 regulated. The 10 protein-coding, hair cycle-regulated IGN genes identified are *Cdkn1c*, *Dcn*,  
650 *Dlk1*, *Gatm*, *Gnas*, *Igf2r*, *Ndn*, *Peg3*, *Sgce*, and *Slc38a4*. (B) Time-course profiles of hair cycle-  
651 regulated IGN gene expression during hair growth. The normalized expression levels of eight  
652 hair cycle-regulated IGN genes [*Igf2*, *Cdkn1c*, *Dcn*, *Dlk1*, *Gnas*, *Mest*, *Peg3*, and *Plagl1*] are  
653 shown in red, and 11 control genes (telogen upregulated genes <sup>18</sup>: *Dbp*, *Tef*, *Nr1d1*, *Per1*, *Per2*,  
654 and anagen/catagen upregulated genes <sup>18</sup>: *Dlx3*, *Elf5*, *Foxn1*, *Foxq1*, *Hoxc13*, and *Ovol1*) are  
655 shown in black]. The y-axis represents the log-transformed, zero-mean gene expression  
656 (normalized gene expression level). Log-transformed, zero-mean gene expression values are  
657 provided in supplemental Table S1 <sup>18</sup>.

658 **Fig. 5. IPA reveals a network including IGN genes.** IPA revealing the annotated interactions  
659 of 35 genes including 12 IGN genes (*Cdkn1c*, *Dcn*, *Dlk1*, *Gatm*, *Gnas*, *Grb10*, *H19*, *Igf2*, *Igf2r*,



660 *Meg3*, *Ndn*, and *Plagl1*, indicated by a square box with a red outline and bold text). The symbols  
 661 for the 26 genes identified as potential upstream regulators of hair cycle-associated genes are  
 662 filled in light red.

663

664

665

666

### 667 13. Tables

668 **Table 1. Potential hair cycle-associated IGN genes (identified in Lin1-dataset)**

| Gene symbol      | Gene name                                                                  | P-value* | Cluster description*                                                                |
|------------------|----------------------------------------------------------------------------|----------|-------------------------------------------------------------------------------------|
| <i>Cdkn1c</i> ** | Cyclin-dependent kinase inhibitor 1C (P57)                                 | 0.0004   | Anti-hair growth pattern with decline in expression level during anagen phase       |
| <i>Dcn</i> **    | Decorin                                                                    | 0.0392   | Does not correspond with any of the three main profile patterns                     |
| <i>Dlk1</i> **   | Delta-like 1 homolog ( <i>Drosophila</i> )                                 | 0.0166   | Anti-hair growth pattern with decline in expression level during anagen phase       |
| <i>Gatm</i>      | Glycine amidinotransferase (L-arginine:glycine amidinotransferase)         | 0.0009   | Anti-hair growth pattern with decline in expression level during anagen phase       |
| <i>Gnas</i> **   | GNAS (guanine nucleotide binding protein, alpha stimulating) complex locus | 0.0040   | Anti-hair growth pattern with decline in expression level during anagen phase       |
| <i>Igf2R</i>     | Insulin-like growth factor 2 receptor                                      | 0.0004   | Hair growth pattern including genes with expression peak early during anagen phase  |
| <i>Ndn</i>       | Necdin                                                                     | 0.0171   | Anti-hair growth pattern with decline in expression level during anagen phase       |
| <i>Peg3</i> **   | Paternally expressed gene 3                                                | 0.0001   | Anti-hair growth pattern with decline in expression level during anagen phase       |
| <i>Sgce</i>      | Sarcoglycan, epsilon                                                       | 0.0117   | Catagen-related expression patterns with decline in expression during catagen phase |
| <i>Slc38a4</i>   | Solute carrier family 38, member 4                                         | 0.0013   | Anti-hair growth pattern with decline in expression during anagen phase             |

669 \* Defined by Lin *et al.* <sup>21</sup>, \*\* Gene was independently identified as a potential hair cycle-regulated  
 670 gene in the Lin2-dataset (see Table 2)

671

672 **Table 2. Potential hair cycle-regulated IGN genes (identified in Lin2-dataset)**

| Gene symbol      | Gene name                                                                  | Cluster description*                   |
|------------------|----------------------------------------------------------------------------|----------------------------------------|
| <i>Cdkn1c</i> ** | Cyclin-dependent kinase inhibitor 1C (P57)                                 | Expression peaks at early anagen phase |
| <i>Dcn</i> **    | Decorin                                                                    | Expression peaks at telogen phase      |
| <i>Dlk1</i> **   | Delta-like 1 homolog ( <i>Drosophila</i> )                                 | Expression peaks at early anagen phase |
| <i>Gnas</i> **   | GNAS (guanine nucleotide binding protein, alpha stimulating) complex locus | Expression peaks at telogen phase      |
| <i>Igf2</i>      | Insulin-like growth factor 2                                               | Expression peaks at early anagen phase |
| <i>Mest</i>      | Mesoderm-specific transcript                                               | Expression peaks at early anagen phase |
| <i>Peg3</i> **   | Paternally expressed gene 3                                                | Expression peaks at early anagen phase |
| <i>Plagl1</i>    | PLAG1-like zinc finger 1                                                   | Expression peaks at early anagen phase |

673 \* Defined by Lin *et al.* <sup>18</sup>, \*\* Gene was also identified as a potential hair cycle-associated gene in  
 674 the Lin1-dataset (see Table 1)

675

676 **Table 3. Identified canonical pathways with the 16 IGN genes significantly enriched**

| Ingenuity canonical pathways                | -log(P-value) | Ratio   | z-score                       | IGN-enriched genes       |
|---------------------------------------------|---------------|---------|-------------------------------|--------------------------|
| Glycine degradation (creatine biosynthesis) | 2.85          | 0.5     | 0                             | <i>Gatm</i>              |
| Estrogen receptor signaling                 | 2.84          | 0.00915 | 0                             | <i>Gnas, Igf2, Igf2r</i> |
| Glioma signaling                            | 2.58          | 0.0182  | 0                             | <i>Igf2, Igf2r</i>       |
| White adipose tissue browning pathway       | 2.44          | 0.0155  | 0                             | <i>Gnas, Ndn</i>         |
| Osteoarthritis pathway                      | 2.03          | 0.00948 | 0                             | <i>Dcn, H19</i>          |
| Apelin muscle signaling pathway             | 1.88          | 0.0526  | 0                             | <i>Gnas</i>              |
| G protein signaling mediated by Tubby       | 1.67          | 0.0323  | No activity pattern available | <i>Gnas</i>              |
| PFKFB4 signaling pathway                    | 1.5           | 0.0217  | 0                             | <i>Gnas</i>              |
| Growth hormone signaling                    | 1.31          | 0.0141  | 0                             | <i>Igf2</i>              |
| Ephrin B signaling                          | 1.31          | 0.0139  | 0                             | <i>Gnas</i>              |

677

678

**Normalized signal intensity (log2)**

15  
10  
5  
0

*Cdkn1c*

*Dcn*

*Dlk1*

*Gatm*

*Gnas*

*Grb10*

*H19*

*Igf2*

*Igf2r*

*Meg3*

*Mest*

*Ndn*

*Peg3*

*Plagl1*

*Sgce*

*Slc38a4*

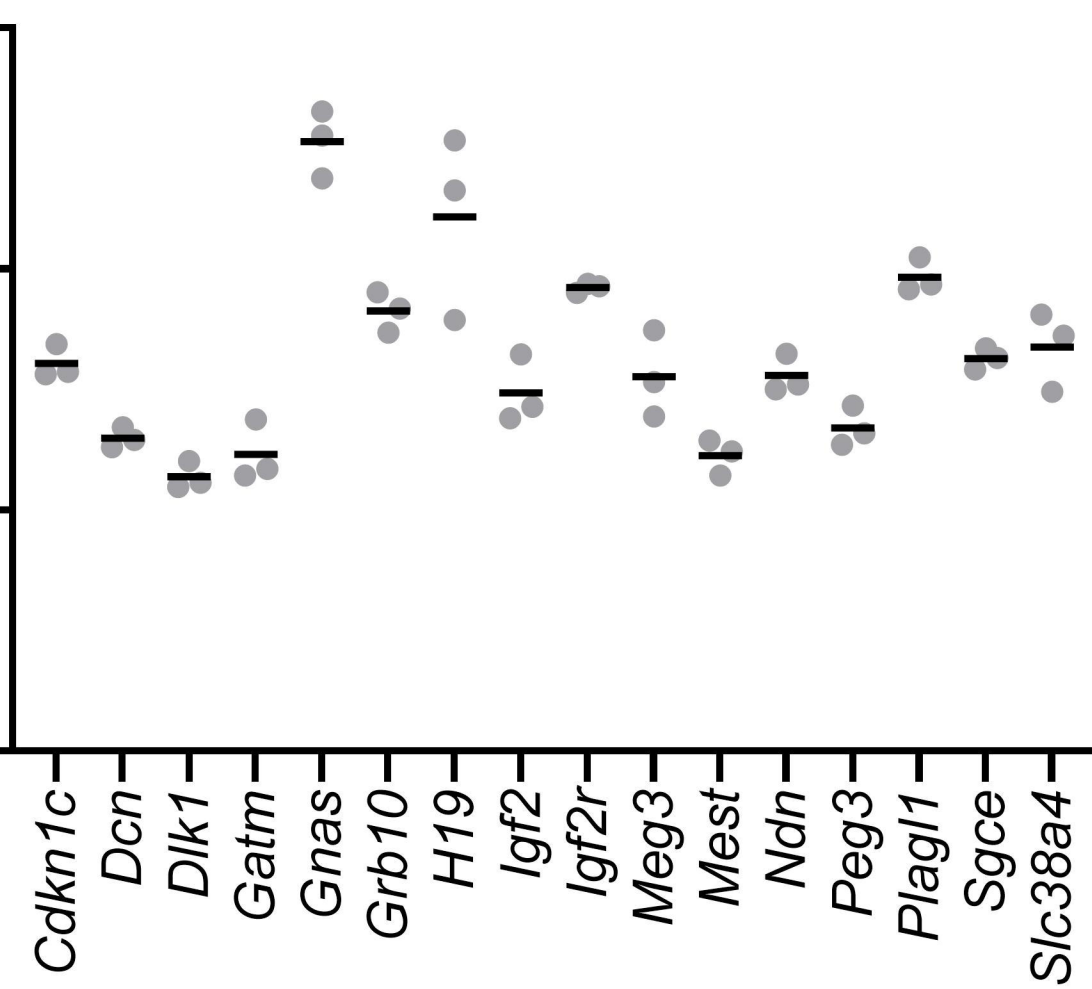

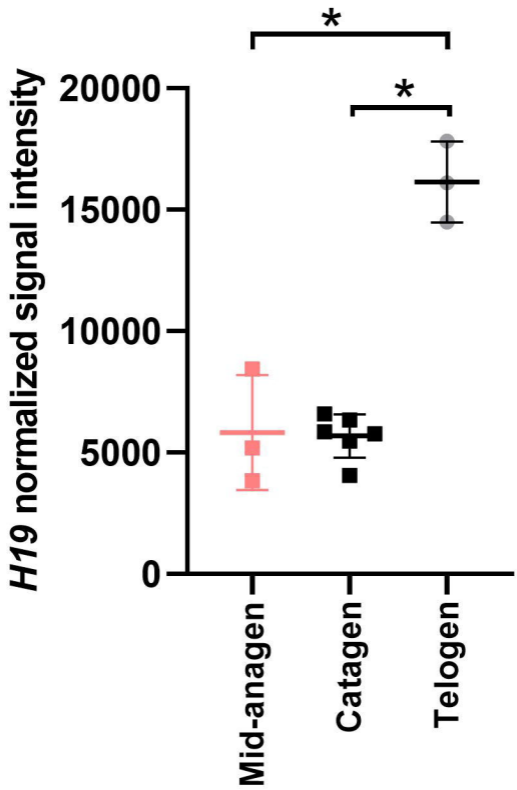

**A**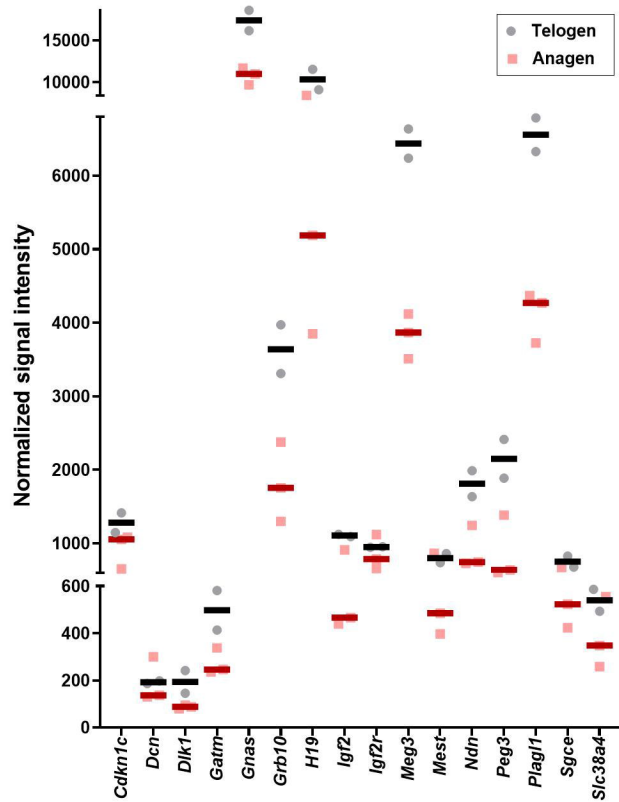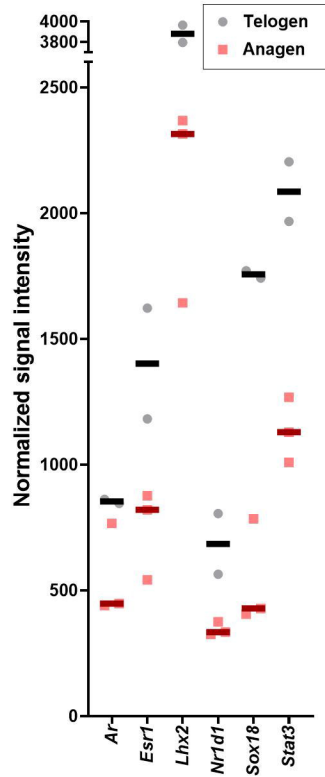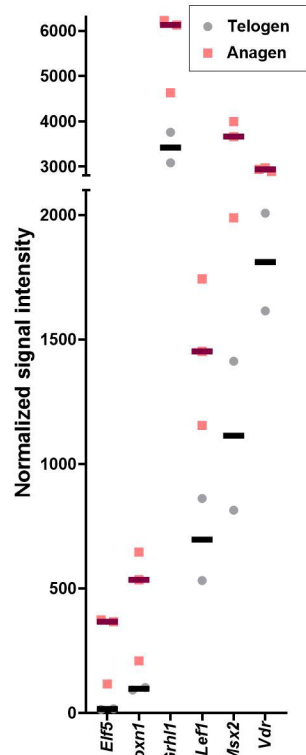**B**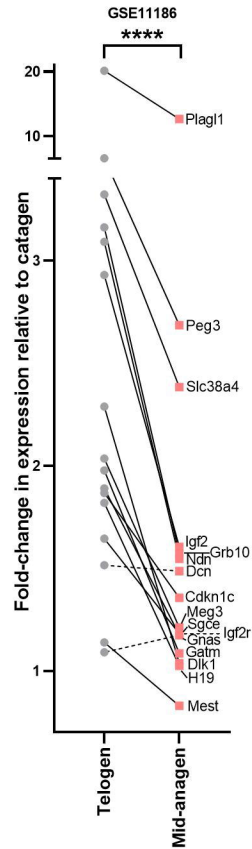

# Figure 4

## A

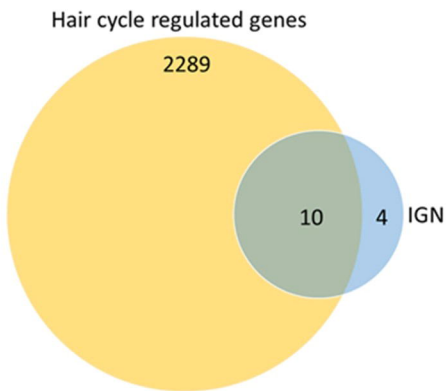

## B

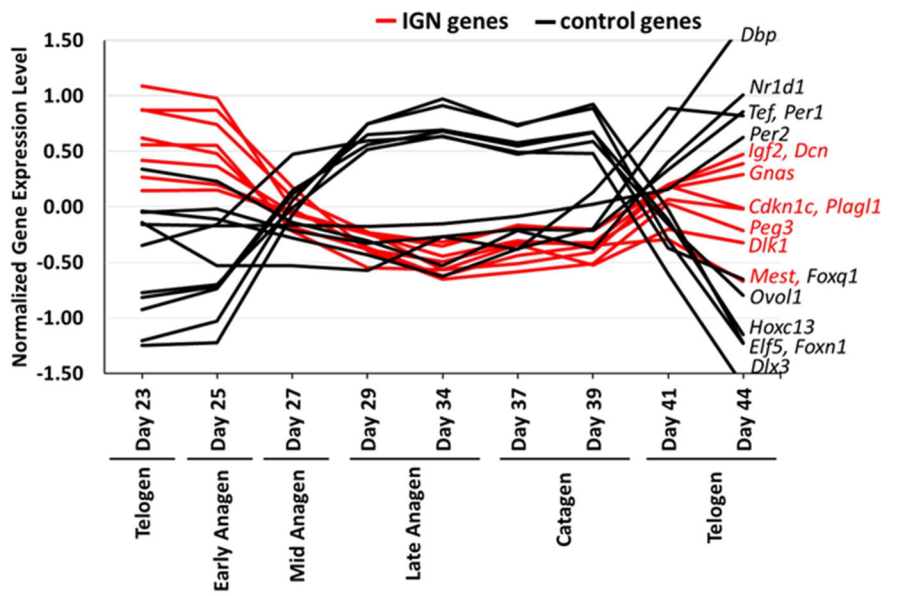

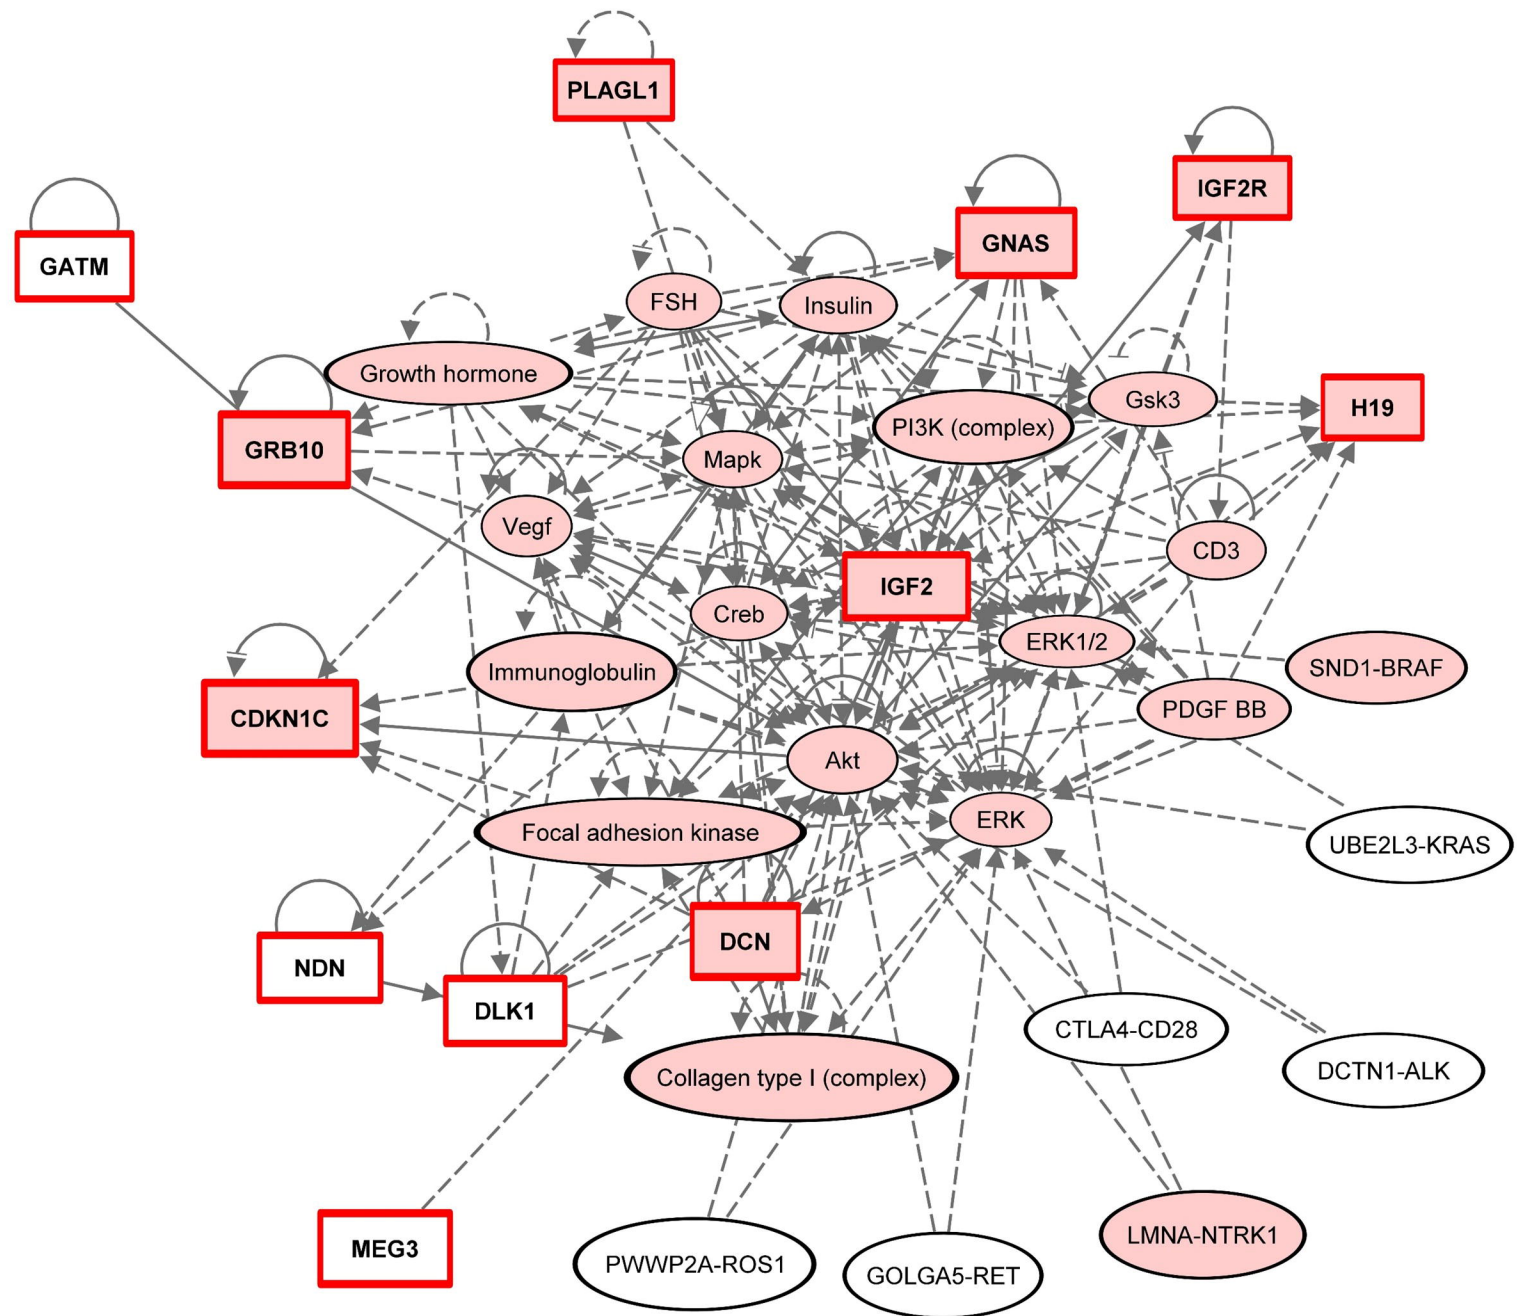

Source: https://www.biorxiv.org/content/10.1101/2020.06.04.134031v2.full.pdf
